# 1 **Microtubule-associated IQD9 guides cellulose synthase velocity to shape seed mucilage**

2

3 Bo Yang<sup>1</sup>, Gina Stamm<sup>2</sup>, Katharina Bürstenbinder<sup>2,\*</sup>, Cătălin Voiniciuc<sup>1,\*</sup>

4

5 <sup>1</sup>Independent Junior Research Group–Designer Glycans, Leibniz Institute of Plant

6 Biochemistry, 06120 Halle (Saale), Germany; <sup>2</sup>Department of Molecular Signal Processing,

7 Leibniz Institute of Plant Biochemistry, 06120 Halle (Saale), Germany;

8

9 \*Authors for correspondence:

10 Katharina Bürstenbinder

11 Tel: +49 345 5582 1226

12 E-Mail: [Katharina.Buerstenbinder@ipb-halle.de](mailto:Katharina.Buerstenbinder@ipb-halle.de)

13

14 Cătălin Voiniciuc

15 Tel: +49 345 5582 1720

16 E-Mail: [Catalin.Voiniciuc@ipb-halle.de](mailto:Catalin.Voiniciuc@ipb-halle.de)

17

18

19

## 20 **E-Mails and ORCID**

|             |                                                                                                  |                     |
|-------------|--------------------------------------------------------------------------------------------------|---------------------|
| <b>B.Y.</b> | <a href="mailto:Bo.Yang@ipb-halle.de">Bo.Yang@ipb-halle.de</a>                                   | 0000-0003-4446-0415 |
| <b>G.S.</b> | <a href="mailto:Gina.Stamm@ipb-halle.de">Gina.Stamm@ipb-halle.de</a>                             |                     |
| <b>K.B.</b> | <a href="mailto:Katharina.Buerstenbinder@ipb-halle.de">Katharina.Buerstenbinder@ipb-halle.de</a> | 0000-0002-3493-4800 |
| <b>C.V.</b> | <a href="mailto:Catalin.Voiniciuc@ipb-halle.de">Catalin.Voiniciuc@ipb-halle.de</a>               | 0000-0001-9105-014X |

21

22

23

24 **Total word count for the main body of the text: 5908**

25 **Summary: 228; Introduction: 798; Materials and Methods: 1695; Results: 1579 words;**

26 **Discussion: 1625; Acknowledgements: 92**

27 **Number of figures: 7** (all in color)

28 **Number of tables: 0**

29 **No of Supporting Information files: 11** in a single PDF (Fig. S1 – S9; Tables S1, S2)

30 **Summary**

31

32 ● Arabidopsis seeds release large capsules of mucilaginous polysaccharides, which are  
33 shaped by an intricate network of cellulosic microfibrils. Cellulose synthase complexes is  
34 guided by the microtubule cytoskeleton, but it is unclear which proteins mediate this  
35 process in the seed coat epidermis (SCE).

36

37 ● Using reverse genetics, we identified *IQ67 DOMAIN 9 (IQD9)* and *KINESIN LIGHT*  
38 *CHAIN-RELATED 1 (KLCR1)* as two highly expressed genes during seed development  
39 and comprehensively characterized their roles for cell wall polysaccharide biosynthesis  
40 and cortical microtubule (MT) organization.

41

42 ● Mutations in *IQD9* as well as in *KLCR1* lead to compact mucilage capsules with aberrant  
43 cellulose distribution, which can be rescued by transgene complementation. Double  
44 mutant analyses revealed that their closest paralogs (*IQD10* and *KLCR2*, respectively) are  
45 not required for mucilage biosynthesis. IQD9 physically interacts with KLCR1 and  
46 localizes to cortical MTs to maintain their organization in SCE cells. Similar to the  
47 previously identified TONNEAU1 (TON1) RECRUITING MOTIF 4 (TRM4) protein,  
48 IQD9 is required to maintain the velocity of cellulose synthases.

49

50 ● Our results demonstrate that IQD9, KLCR1 and TRM4 are MT-associated proteins that  
51 are required for seed mucilage architecture. This study provides the first direct evidence  
52 that members of the IQD, KLCR and TRM families have overlapping roles in guiding the  
53 distribution of cell wall polysaccharides. Therefore, SCE cells provide an attractive system  
54 to further decipher the complex genetic regulation of polarized cellulose deposition.

55

56 **Key words:** Arabidopsis thaliana, cellulose synthesis, cortical microtubules, matrix  
57 polysaccharides, scaffold proteins, seed mucilage, plant cell wall

---

## 58 Introduction

59 The seed coat epidermal (SCE) cells of some Angiosperms, including the model plant  
60 *Arabidopsis thaliana*, synthesize large amounts of hydrophilic polysaccharides (North *et al.*,  
61 2014; Voiniciuc *et al.*, 2015c; Šola *et al.*, 2019). Although the mucilage capsules that rapidly  
62 encapsulate *Arabidopsis* seeds upon hydration are pectin-rich, they can be regarded as  
63 specialized secondary cell walls because they also contain hemicelluloses that are typical of  
64 woody tissues (Voiniciuc *et al.*, 2015c). Substituted xylans and heteromannans maintain the  
65 attachment of mucilaginous pectin to the seed surface and the organization of ray-like cellulose  
66 microfibrils (Yu *et al.*, 2014; Voiniciuc *et al.*, 2015b,a; Hu *et al.*, 2016; Ralet *et al.*, 2016).  
67 Upon imbibition of a dry seed, expanding mucilage ruptures the outer primary cell wall to  
68 release a two-layered gelatinous capsule that can be visualized by ruthenium red (RR), a pectin-  
69 binding dye. Cellulosic rays extend from the top of each SCE cell to intertwine and anchor the  
70 inner, adherent mucilage layer to the seed surface (Sullivan *et al.*, 2011; Mendu *et al.*, 2011;  
71 Harpaz-Saad *et al.*, 2011). However, the genetic factors that modulate the deposition of highly  
72 ordered cellulosic structures in seed mucilage remain largely unknown.

73 The current dogma is that plant crystalline microfibrils are produced by rosette-shaped  
74 cellulose synthase (CESA) complexes (CSC) composed of at least three different CESA  
75 isoforms and a growing number of interacting proteins (Polko & Kieber, 2019). In *Arabidopsis*  
76 SCE cells, mutations in *CESA3* and *CESA5* have been shown to affect the deposition of  
77 cellulose in mucilage pockets. Loss-of-function *cesa5* mutants have a nearly complete loss of  
78 adherent mucilage due to reduced cellulose production (Sullivan *et al.*, 2011; Mendu *et al.*,  
79 2011; Harpaz-Saad *et al.*, 2011), while *cesa3* missense mutants lead to milder alterations of  
80 mucilage adherence and cellulose organization (Griffiths *et al.*, 2015). Several accessory  
81 proteins are also known to influence mucilage cellulose synthesis. COBRA-LIKE2 (COBL2)  
82 contains a glycosyl-phosphatidylinositol (GPI) anchor and facilitates the assembly of  
83 crystalline cellulose by CESA5 (Ben-Tov *et al.*, 2015), while FEI2 (meaning “fat” in Chinese)  
84 and SALT-OVERLY SENSITIVE5 (SOS5) mediate pectin adherence to cellulosic rays via an  
85 independent mechanism (Griffiths *et al.*, 2014, 2016; Ben-Tov *et al.*, 2018). CSC assembly and  
86 trafficking are maintained by STELLOs (Greek for “to send”; Zhang *et al.*, 2016), and  
87 negatively regulated by SHOU4 (“thin” in Chinese; Polko *et al.*, 2018), identified via a screen  
88 for *fei2* suppressors.

89 Cortical microtubules (MTs) can orient cellulose microfibril deposition by positioning the  
90 delivery of CSCs to the plasma membrane (PM) and guiding their subsequent trajectories  
91 (Paredes *et al.*, 2006; Gutierrez *et al.*, 2009; Bringmann *et al.*, 2012a). MT-associated proteins,

92 which shape the cytoskeleton in response to environmental or developmental signals (Lloyd &  
93 Hussey, 2001; Sedbrook & Kaloriti, 2008), can influence the organization of mucilage  
94 polysaccharides. A temperature-sensitive point mutation in *MICROTUBULE*  
95 *ORGANIZATION 1 (MORI)* significantly reduced mucilage release at 29°C (McFarlane *et al.*,  
96 2008). A second MT-associated protein, TONNEAU1 (TON1) RECRUITING MOTIF 4  
97 (TRM4), was recently found to organize cortical arrays and cellulose distribution (Yang *et al.*,  
98 2019). The *trm4* seed mucilage capsules are compact and have shorter cellulosic rays compared  
99 to the WT, without altering pectin adherence. Arabidopsis CESAs circle around the  
100 cytoplasmic column of SCE cells to polarly deposit cellulose microfibrils in mucilage pockets  
101 (Griffiths *et al.*, 2015), but the network of proteins that guide CESAs in SCE cells remains  
102 unclear.

103 Plant-specific IQ67 DOMAIN (IQD) proteins associate with MTs and have scaffold-like  
104 properties (Bürstenbinder *et al.*, 2017). Their eponymous IQ67 domain contains 67 amino acids  
105 with calmodulin-recruiting motifs (Abel *et al.*, 2005), which could be involved in Ca<sup>2+</sup>  
106 signaling integration (Kölling *et al.*, 2019). Since multiple Arabidopsis IQDs control cell shape  
107 and size (Bürstenbinder *et al.*, 2017; Liang *et al.*, 2018; Mitra *et al.*, 2019), they are  
108 hypothesized to support cell wall deposition. Certain IQDs interact with KINESIN LIGHT  
109 CHAIN-RELATEDS (KLCRs; Bürstenbinder *et al.*, 2013; Zang *et al.*, 2021) proteins. KLCRs  
110 are also known as CELLULOSE SYNTHASE-MICROTUBULE UNCOUPLING (CMU) and  
111 stabilize MTs at the PM during cellulose synthesis (Liu *et al.*, 2016). However, direct evidence  
112 for how IQDs influence the biosynthesis of cell wall polysaccharides has been lacking.

113 In this study, we identified IQD9 and KLCR1 as two additional players that maintain  
114 MT organization and the deposition of ray-like cellulosic microfibrils in SCE cells. In the  
115 absence of *IQD9* or *KLCR1*, mutant seeds released compact mucilage capsules due to  
116 aberrant deposition of cellulose microfibrils as previously observed for *trm4* lines. IQD9  
117 physically interacted *in vivo* with KLCR1 and formed filamentous arrays. Live-cell imaging  
118 showed that IQD9 and KLCR1 are localized a circular pattern during mucilage biosynthesis,  
119 which is reminiscent of CSC trajectories. Both *iqd9* and *trm4* mutants displayed slower  
120 CESA3 particles in SCE cells, indicating that these MT-associated proteins guide cellulose  
121 deposition. IQD, KLCR and TRM proteins therefore have overlapping roles in cell wall  
122 biosynthesis.

123

## 124 **Materials and Methods**

### 125 **Plant materials and growth conditions**

126 *Arabidopsis thaliana* Col-0 (WT) and T-DNA insertion mutants (Table S1) analyzed in  
127 this study were obtained from the Nottingham Arabidopsis Stock Centre, unless otherwise  
128 noted. The *proUBQ:RFP-TUB6* in Col-0 (Ambrose *et al.*, 2011), *proCESA3:GFP-CESA3* in  
129 *je5* mutant (Desprez *et al.*, 2007) and *pKLCR1:KLCR1-GFP* in *klcr1-1* (Zang *et al.*, 2021)  
130 transgenic plants have been described previously. Arabidopsis plants were grown in a  
131 phytochamber with constant light (100–120  $\mu\text{mol m}^{-2} \text{s}^{-1}$ ), 22°C and 60% humidity.  
132 *Nicotiana benthamiana* plants were grown in a greenhouse (16 h light, 8 h dark) at 22–24°C.

133

### 134 Arabidopsis transcriptional analyses

135 Total RNA was isolated from 10-day-old seedlings using TRI Reagent (Sigma Aldrich),  
136 according to its manual. The cDNA was prepared from 4  $\mu\text{g}$  of RNA using RevertAid reverse  
137 Transcriptase (Thermo Fisher Scientific), and reverse transcription polymerase chain reaction  
138 (RT-PCR) was performed using primers listed in Table S2. *ACTIN2* served as a housekeeping  
139 gene, and WT genomic DNA was included as a control.

140 For GUS staining, sample tissues (seedlings, flower buds, siliques) were fixed in 80%  
141 (v/v) ice-cold acetone for 30 min and incubated for 4 h to overnight in GUS staining solution  
142 (50 mM sodium phosphate, pH 7.2, 0.5 mM  $\text{K}_3\text{Fe}(\text{CN})_6$ , 0.5 mM  $\text{K}_4\text{Fe}(\text{CN})_6$ , 2 mM 5-bromo-  
143 4-chloro-3-indolyl- $\beta$ -glucuronic acid, 10 mM EDTA) at 37 °C. Images were acquired using a  
144 Zeiss Axioplan 2 microscope or a Nikon SMZ 1000. For GUS staining of Arabidopsis seeds,  
145 siliques of different ages were opened with forceps at the replum. Seeds were collected with a  
146 small spoon and transferred to a 1.5 ml tube with staining solution. Prior to DIC microscopy,  
147 staining solution was removed and samples were mounted in chloralhydrate.

148

### 149 Plasmid construction and plant transformation

150 Primers used for plasmid construction are listed in Table S2. *Promoter:GFP-GUS*  
151 constructs were generated by integrating 1.4 kb of the *IQD9* or *IQD10* promoter into  
152 pBGWFS7 (Karimi *et al.*, 2002). The *pIQD9:IQD9-GFP* transgene was assembled using full-  
153 length genomic DNA (from ~1.5 kb upstream of ATG up to, but excluding, the *IQD9* stop  
154 codon) into pB7FWG0 vector. The constructs were stably transformed into Arabidopsis WT  
155 plants (for *pIQD:GFP-GUS*) or *iqd9 iqd10* double mutant (for *pIQD9:IQD9-GFP*)  
156 respectively via *Agrobacterium*-mediated floral dip transformation. The *p35S:IQD9-GFP*,  
157 *p35S:mCherry-KLCR1*, and *p35S:RFP-KLCR1* transgenes for *N. benthamiana* assays were  
158 cloned using Gateway into pB7FWG2 (Karimi *et al.*, 2002), pJOG393 (Gantner *et al.*, 2018)  
159 or pGWB455 (Nakagawa *et al.*, 2007) vectors, respectively. The mCherry- and RFP-tagged

160 KLCR1 showed similar results. The *pUBQ10:RFP-TUB6* plasmid for transient expression  
161 was previously generated (Yang *et al.*, 2019). Transient expression was performed in *N.*  
162 *benthamiana* leaves as previously described (Grefen *et al.*, 2010). In short, *Agrobacterium*  
163 *tumefaciens* *GV3101* cells containing the desired constructs were mixed with the P19 viral  
164 suppressor (OD600 = 0.7 for each) and incubated for 4 h (at 18 °C, 200 rpm) before  
165 infiltration into the lower side of leaves from 5-week-old plants.

166

### 167 **Staining and quantification of mucilage area**

168       Around 30 seeds were hydrated in water for 30 min and stained with 300 µl of 0.01%  
169 (w/v) RR (Sigma-Aldrich; R2751) for 15 min at 125 rpm in 24-well plates. After rinsing with  
170 water, the stained seeds were re-suspended in 300 µl of water and imaged with a Leica  
171 M165FC stereomicroscope equipped with MC170 HD camera. The mucilage and seed  
172 projected areas were quantified using an existing ImageJ pipeline (Voiniciuc *et al.*, 2015b).

173       Cellulose around hydrated seeds was stained with 0.01% (w/v) Pontamine fast scarlet 4B  
174 (S4B, also known as Direct Red 23 [Sigma-Aldrich; 212490]) in 50 mM NaCl for 60 min at  
175 125 rpm in 24-well plates (Anderson *et al.*, 2010; Mendu *et al.*, 2011). The counterstain was  
176 performed by mixing with 25 µg mL<sup>-1</sup> Calcofluor (Megazyme C-CLFR) for 5 min. Seeds  
177 were imaged with a Carl Zeiss LSM 780 microscope with 10X/0.45 objective and the  
178 following excitation / emission wavelengths (S4B: 561 / 580–650 nm; Calcofluor: 405 / 410–  
179 452 nm). The lengths of cellulosic rays were measured by ImageJ.

180       To view surface morphology, around 30 seeds were mixed with 500 µL of 0.01% (w/v)  
181 propidium iodide for 15 min. Seeds were rinsed twice with water and imaged using a Leica  
182 LSM 900 with 10X/0.3 objective (excitation 488 nm, emission 600-650 nm).

183

### 184 **Seed polysaccharide quantification**

185       Non-adherent mucilage was extracted by gently mixing 5 mg seeds in water for 30 min  
186 at 125 rpm and subsequently the adherent mucilage was isolated using a ball mill (Retsch;  
187 MM400) for 30 min at 30 Hz, as previously described (Voiniciuc, 2016). The two mucilage  
188 fractions, spiked with ribose and inositol respectively, were hydrolyzed and quantified via  
189 high-performance anion exchange chromatography with pulsed amperometric detection  
190 (HPAEC-PAD), as described (Voiniciuc & Günl, 2016) with the following changes. HPAEC-  
191 PAD was performed on a Metrohm 940 Professional IC Vario, using Metrosep Carb 2-  
192 250/4.0 columns and a published gradient (Mielke *et al.*, 2021). Peaks were integrated and  
193 calibrated (manually corrected if necessary) in the MagIC Net 3.2 software (Metrohm).

194 Crystalline cellulose was quantified using the Updegraff reagent (Updegraff, 1969) and  
195 the anthrone colorimetric assay (Foster *et al.*, 2010), as previously adapted for Arabidopsis  
196 whole seeds (Voiniciuc *et al.*, 2015b).

197

### 198 **Salt stress treatments**

199 Germination assays were performed in 24-well culture plates as described previously  
200 (Yang *et al.*, 2021). Around 35 seeds were hydrated in 500  $\mu\text{l}$  of water or 150 mM  $\text{CaCl}_2$   
201 solution per well. All the seeds were vernalized for 66 h (dark, 4°C), transferred to a chamber  
202 with constant light (100–120  $\mu\text{mol m}^{-2} \text{s}^{-1}$ ), 22°C and 60% humidity. The seeds were imaged  
203 every 24 h with a Leica M165FC stereomicroscope and defined as germinated when the  
204 radicle length was  $> 70 \mu\text{m}$ .

205 For the seedling salt stress assay, the seeds were placed on  $\frac{1}{2}$  Murashige and Skoog agar  
206 plates, stratified for 66 h (dark, 4°C) and grown vertically in the climate-controlled chamber  
207 described above. Five-day-old seedlings of similar size were transferred to fresh agar plates  
208 with or without 100 mM NaCl and growth was imaged using a Nikon D5600 digital camera.

209

### 210 **Stem cell wall analyses**

211 Stem sections were cut by hand from the basal third of stems of 6-week-old plants and  
212 were stained in 0.01% toluidine blue O (Sigma-Aldrich; T3260) for 2 min. Stained sections  
213 were rinsed twice with water and imaged on a Axioplan 2 with Axiovision software (Zeiss).

214 The bottom 7 cm of mature stems were harvested and homogenized using a ball mill  
215 (Retsch MM400) for 10 min at 30 Hz. The AIR was extracted by sequential washes with 1  
216 mL of 70% (v/v) ethanol, 1 mL of 1:1 (v/v) chloroform:methanol and 1 mL of acetone. Stem  
217 AIR was hydrolyzed and quantified via HPAEC-PAD exactly as described for seed mucilage,  
218 using ribose as the internal standard.

219

### 220 **Confocal microscopy and image analysis**

221 For fluorescence co-localization assays in *N. benthamiana*, leaf discs at 3 days post-  
222 infiltration were imaged with a Zeiss LSM880 inverted confocal microscope using a 40X/1.2  
223 water-immersion objective. For oryzalin treatment, small pieces of transfected leaf were  
224 immersed with 1% (v/v) dimethylsulfoxide (DMSO) as mock treatment or 1% (v/v) DMSO  
225 containing 0.1 mM oryzalin (Sigma-Aldrich) for 4 h.

226 For the fluorescence imaging of the Arabidopsis SCE cells, seeds were carefully  
227 dissected from siliques at specific stages and were imaged using a Zeiss LSM880 in Airyscan

228 mode with a 40X/1.2 water-immersion objective. For PM, 7 DPA (days post-anthesis) seeds  
229 were pre-stained in 50  $\mu$ M FM4-64 for 30 min before imaging. The subcellular localization  
230 of GFP-CESA3 was detected using a 63X/1.4 oil-immersion objective and Airyscan mode,  
231 with 330 ms exposure time based on previously described protocols (Vellosillo *et al.*, 2015;  
232 Duncombe *et al.*, 2020). Unless stated otherwise, the time-lapse series were acquired every 5  
233 sec for 5 min. All the samples were mounted on confocal dishes with spacers (VWR  
234 International; 734-2905) and were examined with the following excitation/emission settings:  
235 GFP (488 / 505–530 nm), RFP/mCherry (514 / 580–635 nm), FM4-64 (514 / 600–700 nm).

236 For hypocotyl imaging, seeds were sowed on  $\frac{1}{2}$  MS agar plates and stratified for 66 h  
237 (dark, 4°C). The plates were exposure to light for 6 h at room temperature and then were  
238 wrapped with aluminum foil to keep the plates in the dark at room temperature. For the  
239 observation of RFP-TUB6 in the hypocotyl epidermal cells, the inner face of epidermal cells  
240 in zone 1 of 4-d-old dark-grown seedlings were examined as described previously (Crowell *et*  
241 *al.*, 2011).

242 All images were processed uniformly using ImageJ. The maximum projection of the Z-  
243 stack or time-lapse view was generated by frames using the Z Project tool and average  
244 intensity. For the colocalization evaluation, the intensity plot analysis was done by “RGB  
245 Profile Plot” plugin. The Pearson correlation coefficient of region of interest (ROI) from  
246 single frame was quantified with “Coloc 2”. Kymograph analysis of proteins and velocity  
247 quantification of GFP-CESA3 were performed as previously described (Vellosillo *et al.*,  
248 2015). Briefly, the time-lapse stack was generated with “Walking Average” plugin. The GFP-  
249 CESA3 track was depicted using segmented line on time average image and transferred to  
250 time-lapse stack. The kymographs were generated using the “MultipleKymograph” plugin,  
251 and the slope of each line was used to calculate the particle velocity.

252

### 253 **Protein-Protein Interactions**

254 Proteins were extracted from transiently transformed *N. benthamiana* leaves using 1 ml  
255 lysis buffer (20 mM HEPES, pH 7.5, 40 mM KCl, 1 mM EDTA, 0.1% [v/v] Triton X-100, 1 $\times$   
256 protease inhibitor cocktail, 1 mM phenylmethylsulfonyl fluoride, and 10% [v/v] glycerol)  
257 (Ganguly *et al.*, 2020). Homogenate from 500 mg of plant material was centrifuged twice at  
258 4°C at 15000 g for 10 min, and 900  $\mu$ l of the supernatant was incubated with 20  $\mu$ l GFP-Traps  
259 (Chromotek) overnight at 4°C on a rocking shaker. Beads were equilibrated following  
260 manufacturer’s manual using lysis buffer, without Triton-X. The next day, beads were washed  
261 four times and were boiled in 80  $\mu$ l 2x Laemmli Buffer. For each sample, 40  $\mu$ l were loaded



262 on a SDS gel and blotted afterwards for 1 h. For protein detection, 1:1000 dilution of the GFP  
263 antibody 3H9 (Chromotek) or the RFP antibody 6G6 (Chromotek) was used. Anti-mouse  
264 (Sigma A9044 1:20000) and anti-rat (Thermo 31470 1:3000) secondary antibodies conjugated  
265 to horseradish peroxidase were used to detect RFP and GFP signals, respectively. Western blot  
266 images were acquired with a FluorChem system, using 1:1 mixture of Amersham ECL-Prime  
267 and ECL-Select as chemiluminescent detection reagents.

268

## 269 **Results**

### 270 ***IQD9* and *KLCR1* control seed mucilage architecture**

271 We hypothesized that one or more *IQD* genes are involved in Arabidopsis seed mucilage  
272 biosynthesis and screened their expression profiles using published transcriptional datasets.  
273 *IQD9* (At2G33990) and *IQD10* (At3G15050), its closest paralog, were upregulated in the seed  
274 coat at the stages of mucilage biosynthesis (Fig. 1a; Winter *et al.*, 2007; Le *et al.*, 2010). T-  
275 DNA insertions in these genes disrupted their transcription (Fig. 1b) and were screened for  
276 seed mucilage defects. While *iqd10* mutant seeds resembled WT, two independent *iqd9*  
277 mutants displayed compact RR-stained mucilage capsules (Fig. 1c). Consistent with  
278 microarray data and the seed mucilage defects (Fig. 1), *promoter:GUS* reporter assays only  
279 showed high seed coat activity for *pIQD9* (Fig. S1). *IQD9* and *IQD10* displayed partially  
280 overlapping expression profiles but share only 47% amino acid identity (Fig. S1). Furthermore,  
281 *iqd9-1 iqd10-1 (i9 i10)* double mutant seeds showed compact mucilage capsules resembling  
282 the *iqd9* single mutants (Fig. 1c).

283 Since IQD-KLCR interactions have been reported (Bürstenbinder *et al.*, 2013), we also  
284 assessed if *KLCR1/CMU1* (At4g10840) and *KLCR2/CMU2* (At3g27960) are involved in  
285 mucilage biosynthesis. *KLCR1* was highly expressed throughout the seed development, while  
286 *KLCR2* transcription peaks at the pre-globular and globular stages, before mucilage  
287 biosynthesis (Fig. S2a). Two knockout *klcr1* alleles, *klcr1-1* and *cmu1* (Fig. S2b, Table S1),  
288 resembled the *iqd9* compact mucilage defect (Fig. 1a), while *klcr2* seeds displayed WT-like  
289 mucilage. Both *iqd9* as well as *klcr1* mutants reduced mucilage capsule area by 30–40%  
290 compared to WT (Fig. 1d), without altering seed size. The double mutant *i9 i10* and *klcr1-1*  
291 *klcr2-2 (k1 k2)* phenocopied the mucilage structure of *iqd9-1* and *klcr1-1* respectively,  
292 indicating no functional redundancy between the related genes. Transgene complementation  
293 of *i9 i10* with *IQD9* and of *klcr1-1* with *KLCR1* fully rescued the compact mucilage defects  
294 (Fig. 1). Both *iqd9* and *klcr1* mutants resembled the mucilage phenotype of *trm4*, which has  
295 SCE cells with disorganized MTs (Yang *et al.*, 2019). Moreover, *iqd9 klcr1* and *iqd9 trm4*

296 double mutants displayed compact RR-stained mucilage capsules equivalent to the single  
 297 mutants (Fig. S2c–f).

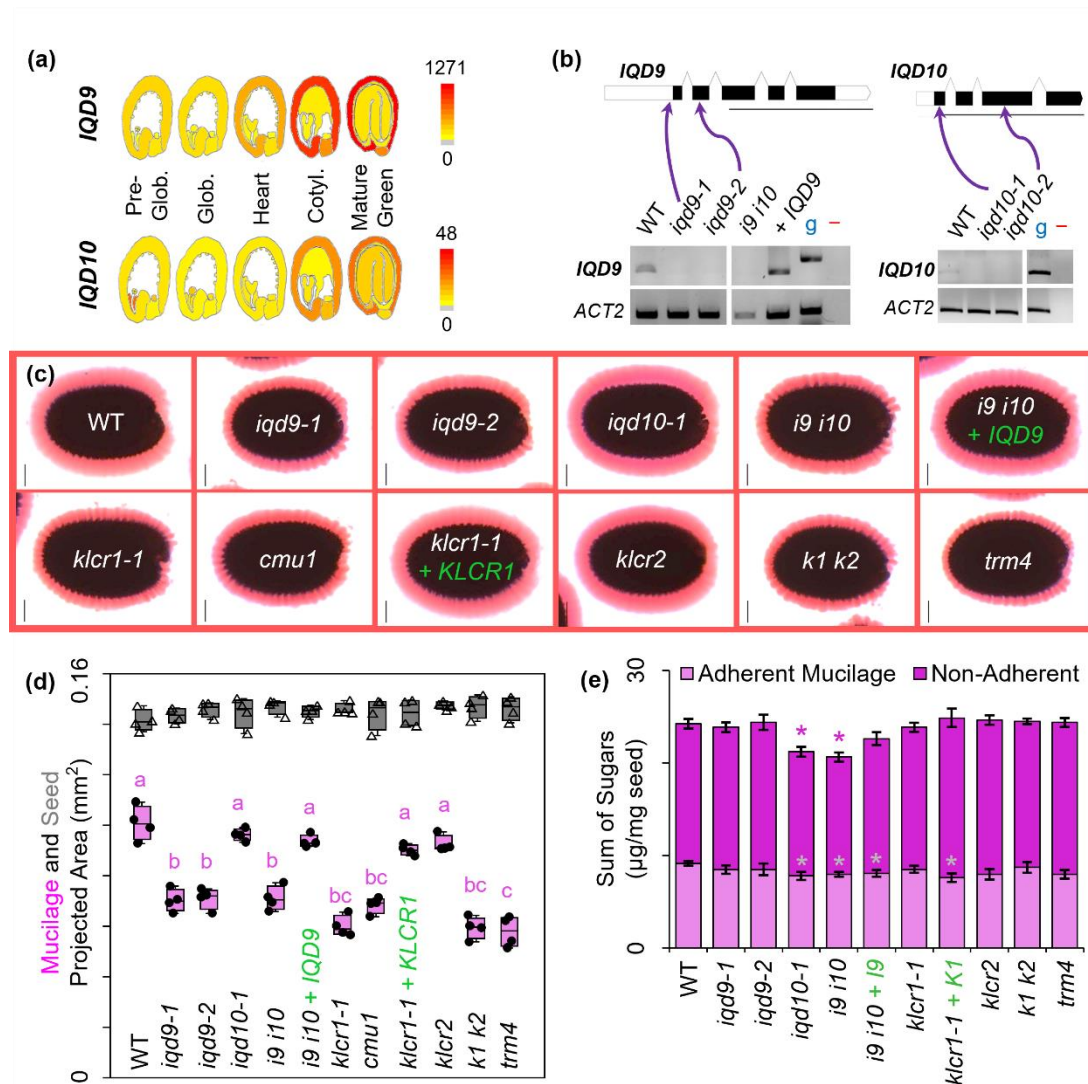

**Fig. 1** Mutation of *IQD9* and *KLCR1* caused compact mucilage capsule. (a) Expression profiles in the seed eFP browser (Winter *et al.*, 2007; Le *et al.*, 2010), including absolute expression values. Glob. (globular); Cotyl. (cotyledon). (b) UTR, intron and exon structure of candidate genes. The position and the effects of T-DNA insertions were verified using RT-PCR, *ACTIN2* as a reference gene, g as genomic DNA control, and – as no DNA control. Transgene complemented were marked by + *IQD* or + *KLCR*. Scale bars for gene models = 1000 bp. (c) RR staining of adherent mucilage capsules after gentle shaking in water. Bars = 100 μm. (d) Seed (triangles) and RR-stained mucilage (black dots) area of four biological replicates (>20 seeds each) per genotype. Boxes show the 25–75% quartiles, the median value (inner horizontal line), and whiskers extending to the largest/smallest values. Different letters mark  $P < 0.01$  for one-way ANOVA with Tukey test. (e) Absolute amounts of monosaccharides in sequentially-extracted mucilage fractions. Data show mean  $\pm$  SD of 5 biological replicates, and asterisks mark significant changes compared to WT (Student's t-test,  $P < 0.001$ ). See Fig. 2 for detailed composition.

298

### 299 *IQD9* and *KLCR1* are specifically required for cellulose distribution in mucilage

300 Monosaccharide analysis of non-adherent and adherent mucilage fractions revealed that  
 301 the *iqd9*, *klcr1* and *trm4* mutants did not alter the content or adherence of matrix

302 polysaccharides to the seed surface (Fig. 1e). Surprisingly, despite no impact on RR staining,

303 the *iqd10-1* mutation correlated with a small but statistically significant reduction in total  
 304 extractable monosaccharides (Fig. 1c–e). The *iqd10-1* mutation decreased rhamnose (Rha)  
 305 and galacturonic acid (GalA) content in non-adherent mucilage, along with galactose (Gal)  
 306 and arabinose (Ara) in adherent mucilage (Fig. 2). Nevertheless, compared to the  
 307 galactoglucomannan-deficient *muci10* mutant with compact mucilage, all the MT-related  
 308 mutant seeds released relatively normal levels of mucilage glycans (Fig. 2).

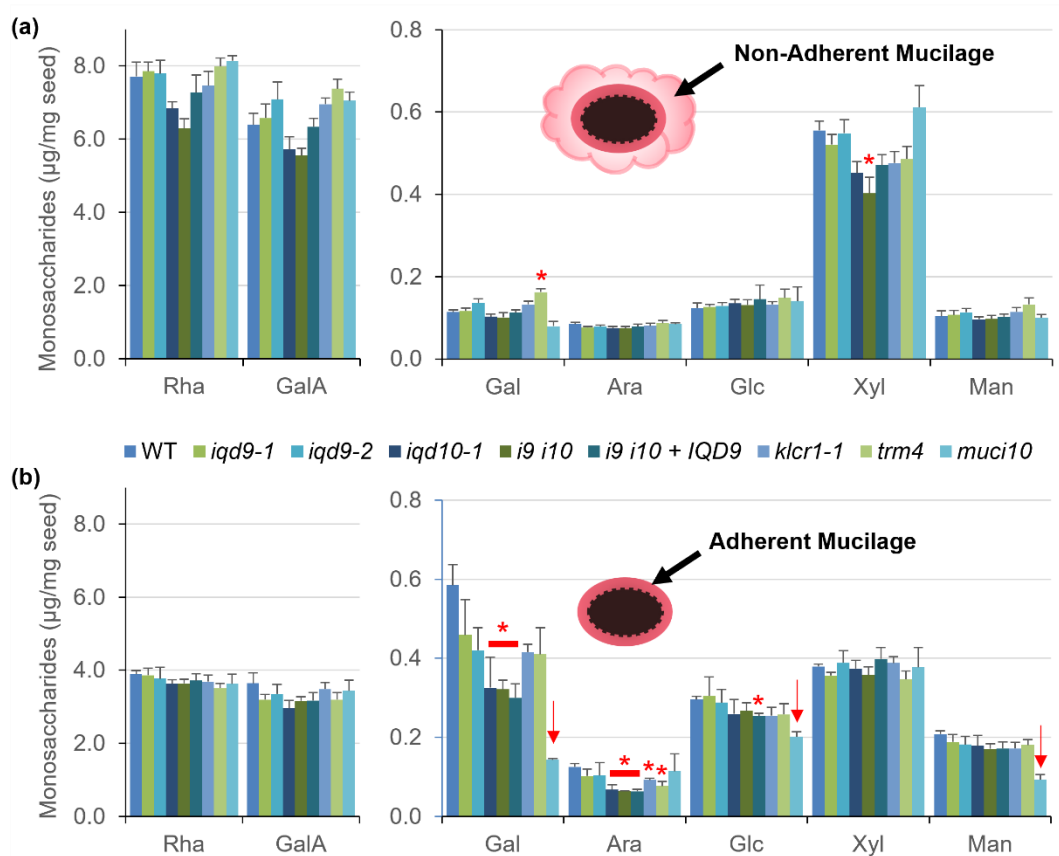

**Fig. 2** Composition of matrix polysaccharides in seed mucilage extracts. (a) Non-adherent and (b) adherent mucilage polysaccharides were sequentially extracted using water and different mixing intensities. Data show mean + SD of 5 biological replicates (only 3 for *muci10*). Red asterisks and arrows (for galactoglucomannan subunits) mark differences from WT (Student's t-test,  $P < 0.0001$ ).

309

310 Since the matrix polysaccharide composition could not account for the compact  
 311 mucilage defects of *iqd9* and *klcr1*, we then examined the structure of cellulose using S4B, a  
 312 specific fluorescent dye (Anderson et al., 2010). The *iqd9* and *klcr1* mutant seeds extruded  
 313 less cellulose upon hydration (Fig. 3a) and had ~30% shorter rays atop each columella  
 314 compared with WT (Fig. 3b). Moreover, the mutant seeds lacked the diffuse cellulose  
 315 staining that was observed between the WT rays. The S4B-stained seeds of *i9 i10* and *k1 k2*  
 316 resembled the *iqd9* and *klcr1* single mutants, while *iqd10* and *klcr2* had WT-like seeds. The  
 317 cellulose defects of *i9 i10* and *klcr1* mutants were rescued by *IQD9* and *KLCR1* transgene

318 complementation, respectively, using their native promoters (Fig. 3a). While all the *iqd9*,  
 319 *klcr1* and *trm4* mutant combinations examined showed short S4B-stained cellulosic rays  
 320 compared to WT (Fig. 3 and Fig. S3), counterstaining of mucilage with calcofluor displayed  
 321 relatively normal content of other  $\beta$ -glucans (Fig. S3). Despite evident changes in the  
 322 architecture of cellulose extruded from hydrated seeds, these MT-related mutants did not alter  
 323 the crystalline cellulose content of whole seeds (Fig. 3c). Mutations in *IQD9* or *KLCR1* did  
 324 not alter seed shape (Fig. S4), nor the germination rate or sensitivity to salt (Fig. S5).  
 325 Therefore, like *TRM4* (Yang *et al.*, 2019), the expression of *IQD9* and *KLCR1* in seeds  
 326 primarily affect mucilage polymer organization.  
 327

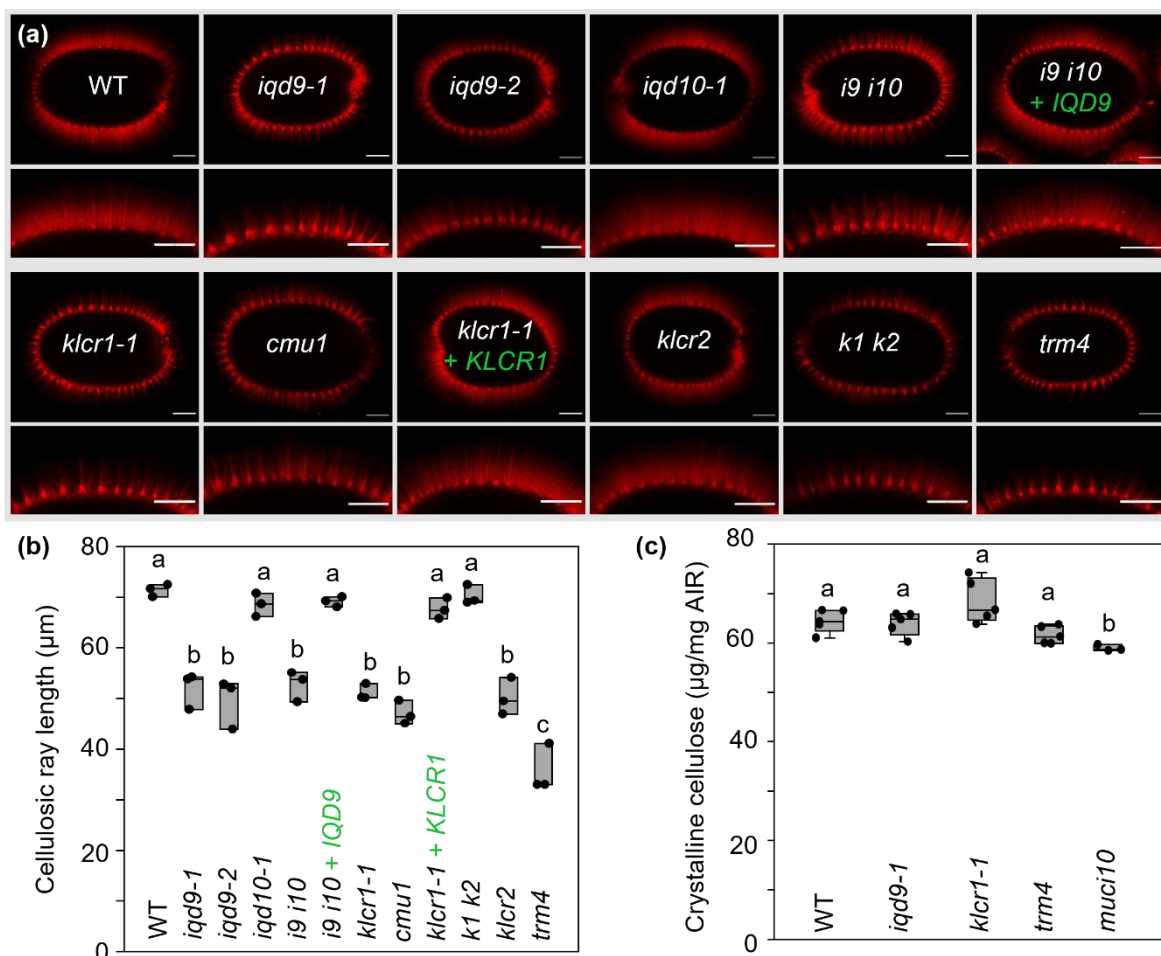

**Fig. 3** *IQD9* and *KLCR1* are important for cellulose deposition around seed surface. (a) S4B-stained cellulosic rays in mucilage capsules. Bars = 100  $\mu\text{m}$ . (b) The length of cellulose rays stained with S4B. Boxes show the 25–75% quartiles, the median value (inner horizontal line), and whiskers extending to the largest/smallest values ( $\geq 10$  measurements per biological replicate). (c) Crystalline cellulose content in whole seeds (5 biological replicates per genotype, except 3 for *muci10*). Different letters in (b) and (c) mark significant changes (one-way ANOVA with Tukey test,  $P < 0.01$ ).

328

### 329 *IQD9* and *IQD10* are also expressed beyond the seed coat

330

Based on *promoter::GUS* reporter fusions, *pIQD9* and *pIQD10* promoters were active in

331 multiple plant tissues, including the vasculature system (shoot and roots), developing flowers  
332 and siliques (Fig. S1). Except for anthers, *pIQD9* showed higher activity than *pIQD10* in  
333 reproductive organs and seeds (Fig. S2). *IQD10* was expressed highest in Arabidopsis stems  
334 and its ortholog in *Populus deltoides* (*PdIQD10*) affects the development of the woody stem  
335 (Badmi *et al.*, 2018). However, stem cross-sections of the *iqd10* single mutants and the *i9 i10*  
336 double mutant did not show the *irregular xylem (irx)* phenotype observed in secondary cell  
337 wall mutants such as *irx14* (Fig. S6a). Furthermore, *iqd* stems had normal monosaccharide  
338 composition (Fig. S6b), while *irx14* stems were xylan-deficient as previously described  
339 (Brown *et al.*, 2007). *IQD9* and *IQD10* are thus not indispensable for the formation of xylem  
340 cells with thick secondary cell walls, or their functions could be masked by other IQDs.

341

### 342 **IQD9 proteins associate with MTs and interact with KLCR1**

343 To determine the subcellular localization of IQD9 proteins, we first co-expressed IQD9-  
344 GFP fusion proteins and the MT marker RFP-TUB6 in *N. benthamiana* leaf epidermal cells.  
345 IQD9-GFP localized in striated arrays that overlapped with RFP-TUB6 at the cell cortex (Fig.  
346 S7), and could be abolished by treating cells with MT-depolymerizing oryzalin. Next, we co-  
347 expressed IQD9-GFP with mCherry-tagged KLCR1 (mCherry-KLCR1) in *N. benthamiana*  
348 and found that they were co-localized in arrays resembling MTs (Fig. 4a–c). IQD9 and  
349 KLCR1 still co-localized when their striated patterns were disassembled by oryzalin  
350 treatment (Fig. 4c–e). We validated that these two proteins physically interact using co-  
351 immunoprecipitation (co-IP). IQD9-GFP and RFP-tagged KLCR1 (RFP-KLCR1) proteins  
352 were expressed in *N. benthamiana* leaves, extracted and purified by GFP-trap beads. Western  
353 blotting showed that all recombinant proteins were present in the input fractions (Fig. 4f),  
354 before the addition of the GFP-binding beads. RFP-KLCR1 proteins were detected on GFP-  
355 Trap beads only when co-expressed with IQD9-GFP, but not with GFP alone. Therefore,  
356 IQD9 proteins physically interacted with KLCR1 *in vivo* and were closely associated with  
357 cortical MTs.

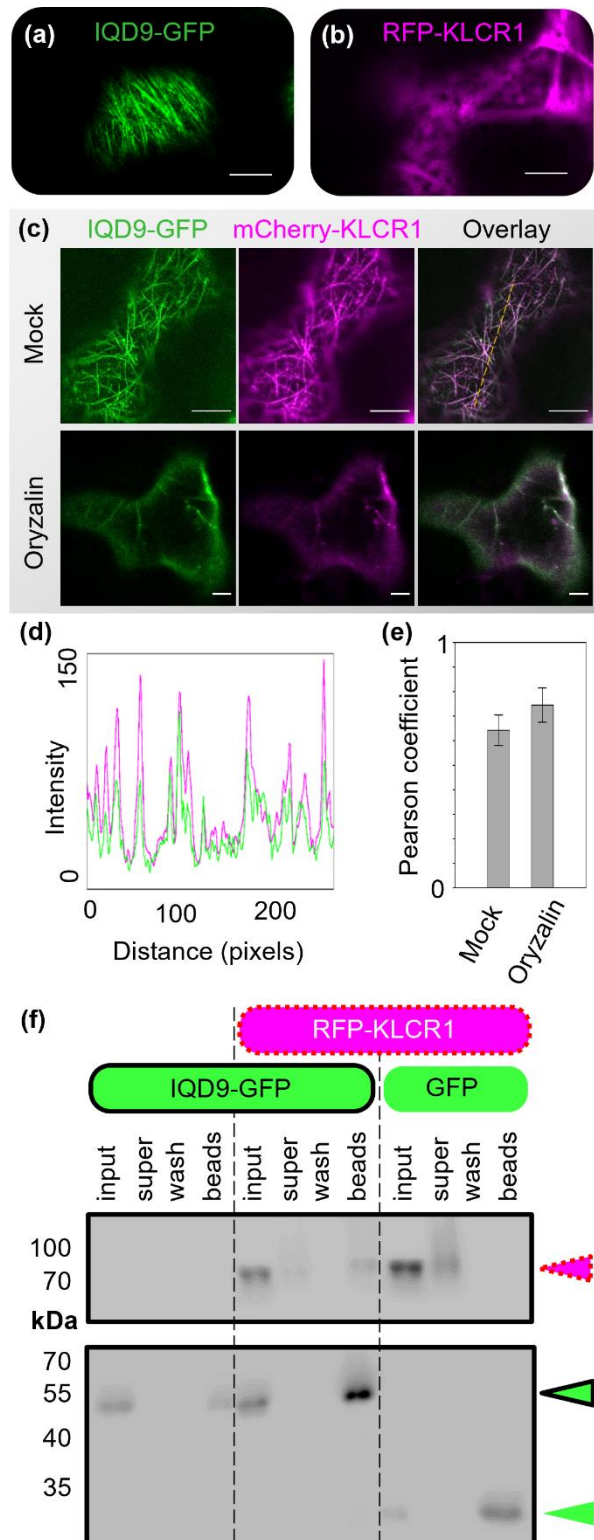

**Fig. 4** IQD9 co-aligns and interacts with KLCR1. (a) IQD9-GFP localized in cortical arrays in *N. benthamiana* cells. (b) RFP-KLCR1 shows diffuse localization when overexpressed on its own in tobacco. (c) Subcellular co-localization of IQD9-GFP and mCherry-KLCR1 in the mock and oryzalin-treated tobacco epidermal cells. Both transiently expressed proteins were oryzalin-sensitive. (d) Fluorescent intensity plot along the dashed line in (c). Bars = 10  $\mu$ m. (e) Pearson correlation coefficient between IQD9-GFP and mCherry-KLCR1 in (c), n=5 cells from 5 independent treatments. (f) Co-IP of proteins transiently expressed in tobacco leaves. Colored triangles marked the expected size of each protein. Labels: Input (protein supernatant before adding the GFP-Trap beads); Super (unbound supernatant after bead incubation); Wash (Supernatant from last wash step); Beads (co-IP proteins that tightly bind GFP-Trap).

358

359

### 360 Localization of IQD9-GFP during mucilage biosynthesis

361 To investigate the distribution of IQD9-GFP in Arabidopsis, we examined its subcellular  
 362 localization under the control of its native promoter in the complemented *iqd9* line, which  
 363 rescued the mucilage defects (Fig. 1). While undetectable in young seedlings, IQD9-GFP

364 fluorescence was evident during seed coat development (Fig. S8a), particularly at the peak  
365 stage of mucilage biosynthesis. Z-stack maximum projections displayed IQD9-GFP proteins  
366 in MT arrays, near the PM and inside the nucleus (Fig. 5a). IQD9-GFP displayed circular  
367 arrays around the cytoplasmic column, resembling previously described CESA trajectories  
368 during mucilage production (Griffiths *et al.*, 2015). At SCE cell boundaries, IQD9-GFP  
369 proteins co-localized with the PM stained by FM4-64. Time-lapse imaging revealed that  
370 IQD9-GFP proteins were static (the vertical lines in kymograph; Fig. 5b), as previously noted  
371 for KLCR/CMU proteins (Liu *et al.*, 2016). Highly immobile KLCR1-GFP proteins,  
372 expressed under its native promoter in the complemented *kclr1* line, were also associated  
373 with both MTs and PM throughout SCE development (Fig. S8b), but lacked the nuclear  
374 localization observed for IQD9-GFP. In cross-sectional views of live SCE cells, both IQD9-  
375 GFP and KLCR1-GFP were localized primarily as striated arrays adjacent to the mucilage  
376 pocket (Fig. 5c,d).

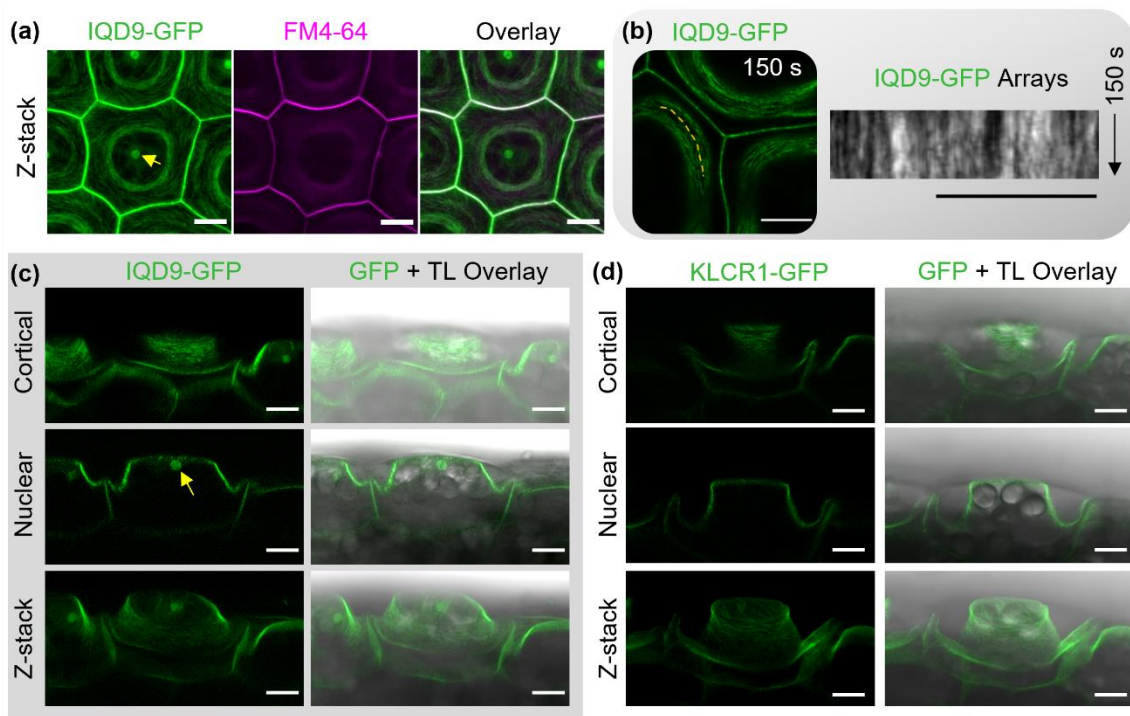

**Fig. 5** IQD9 and KLCR1 localization during mucilage biosynthesis in complemented lines. (a) Z-stack maximum projection of IQD9-GFP SCE cells stained with FM4-64 at 7 DPA. IQD9 is localized at the plasma membrane, MTs and in a nuclear body (arrow). (b) Time-lapse of IQD9-GFP and kymograph along the dashed line. (c) Cross-sectional views of SCE cells expressing IQD9-GFP. The arrow marks a nuclear compartment. (d) Cross-sectional views of SCE cells expressing KLCR1-GFP during mucilage biosynthesis. Bars = 10 μm.

377

### 378 ***IQD9* maintains MT organization in SCE cells**

379 Proper MT organization is essential for the establishment of mucilage architecture. The  
380 MT marker RFP-TUB6, which formed circular arrays around the cytoplasmic column of SCE

381 cells at 7 DPA (Yang *et al.*, 2019), was introduced into the *iqd9-1* mutant by crossing. In  
382 contrast to the WT background, circular MT arrays were undetectable in all *iqd9* SCE cells  
383 expressing RFP-TUB6 (Fig. 6). While MT organization was severely disrupted in the seed  
384 coat, both WT and *iqd9* displayed transversely oriented RFP-TUB6 arrays in hypocotyl  
385 epidermal cells (Fig. S9), despite some variation in fluorescence intensity. Therefore, the  
386 distribution of cortical MTs in the seed coat depends heavily on *IQD9*, while cytoskeleton  
387 organization in other tissues likely requires additional *IQDs*.

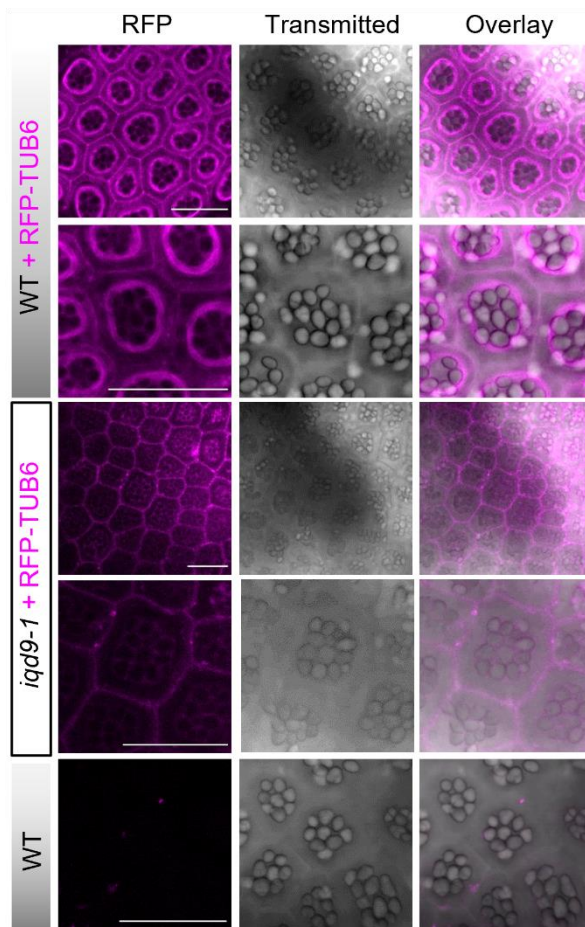

**Fig. 6** MT organization was impaired in *iqd9* SCE cells. Z-stack maximum projections of RFP-TUB6 in the SCE cells at 7 DPA stage. RFP-TUB6 cortical arrays formed in the WT background but not in *iqd9* SCE cells. WT cells without RFP-TUB6 served as a negative control. Bars = 50  $\mu\text{m}$ .

388

### 389 **The loss of *IQD9* reduces CESA3 velocity**

390 CESA3 is a key subunit of the CSC that polarly deposits cellulose in seed mucilage  
391 pockets (Griffiths *et al.*, 2015). Since cellulose distribution is disordered in *iqd9* mucilage  
392 (Fig. 3), we hypothesized that *IQD9* influences CSC motility at the cell cortex. Consistent  
393 with previous results (Griffiths *et al.*, 2015), time-lapse images revealed GFP-CESA3  
394 proteins moved in a unidirectional, clockwise manner around the cytoplasmic column of SCE  
395 cells (Fig. 7). While this pattern was still present, the velocity of GFP-CESA3 particles  
396 decreased from  $135.9 \pm 8.2 \text{ nm min}^{-1}$  in WT cells to only  $92.8 \pm 17.3 \text{ nm min}^{-1}$  in *iqd9* (mean  
397  $\pm$  SD; at least 170 measurements of 9 cells from 3 plants per genotype). Consistent with their



398 mucilage staining phenotypes (Fig. 1, Fig. S2 and Fig. S3), the movement of GFP-CESA3  
399 was also reduced in *trm4* cells, akin to *iqd9* (Fig. 7). In these mutant seeds, CSC movement  
400 appeared to be uncoupled from MTs, a behavior previously described for CESA proteins in  
401 *klcr* (*cmu*) mutants (Liu *et al.*, 2016), but could not be monitored in greater detail due to the  
402 severe disruption of RFP-TUB6 localization in SCE cells (Fig. 6; Yang *et al.*, 2019). Taken  
403 together, IQD9 is a novel protein required for seed mucilage biosynthesis by maintaining  
404 cortical MT arrays and the speed of CESA movement, which influence cellulose distribution.

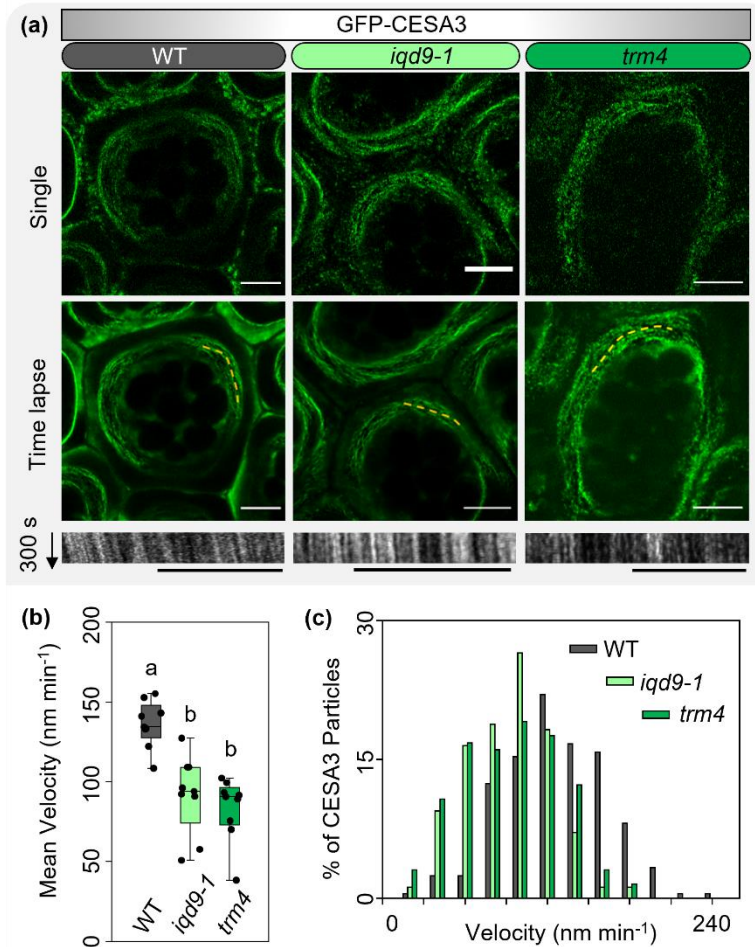

**Fig. 7** *IQD9* and *TRM4* enhance the velocity of GFP-CESA3 proteins. (a) Single and time-lapse images (acquired every 5 s for 300 s) of GFP-CESA3 in WT, *iqd9* and *trm4* SCE cells at 7 DPA. The bottom row shows kymographs of GFP-CESA3 from dashed lines in the middle row. Bars = 10  $\mu$ m. (b) Mean GFP-CESA3 velocity in 9 cells from three plants per genotype. Letters label significant differences (one-way ANOVA with Tukey test,  $P < 0.01$ ). (c) Distribution of GFP-CESA3 velocities for analyzed particles (N=209 for WT, 170 for *iqd9* and 131 for *trm4*).

405

## 406 Discussion

407 In the past decade, SCE cells have become a popular model to identify and study cell  
408 wall regulators as well as carbohydrate-active enzymes. Dozens of mucilage-related genes  
409 have been gradually characterized in *Arabidopsis* (Voiniciuc *et al.*, 2015c; Šola *et al.*, 2019),  
410 primarily through forward and reverse genetic screens. In addition to mutants generated in the  
411 laboratory, the architecture of mucilage  $\beta$ -glucans was found to vary dramatically in natural  
412 populations of *Arabidopsis thaliana* (Sullivan *et al.*, 2011; North *et al.*, 2014; Voiniciuc *et*  
413 *al.*, 2016). The *Arabidopsis* research findings have been accompanied by advances in the

414 mucilage structure of food crops such as *Linum usitatissimum* (flax; [Viudes et al., 2020](#)) and  
415 *Plantago ovata* (psyllium; [Cowley & Burton, 2021](#)), which contain a higher proportion of  
416 non-pectic polymers. Despite the evolution of various mucilage traits within the *Brassicaceae*  
417 family ([Viudes et al., 2021](#)), how MTs regulate the intricate organization of this specialized  
418 secondary cell wall has remained a relatively blank slate. The Arabidopsis genome encodes  
419 hundreds of putative MT-associated proteins, but only MOR1 and TRM4 were previously  
420 shown to influence seed mucilage synthesis ([McFarlane et al., 2008](#); [Hamada, 2014](#); [Yang et al., 2019](#)).  
421 Additional MT-associated proteins (e.g. CSI1/POM2; CC1; IQD13 and  
422 KLCRs/CMUs) involved in cell wall biosynthesis were characterized in other tissues ([Li et al., 2012](#);  
423 [Bringmann et al., 2012b](#); [Enderl et al., 2015](#); [Liu et al., 2016](#); [Sugiyama et al., 2017](#)),  
424 so the players that guide mucilage biosynthesis remained unclear.

425

### 426 **IQD9 sustains MT organization during specialized cell wall deposition**

427 In this study, we discovered that IQD9 and its interactor KLCR1 localize to cortical  
428 arrays that resemble the circular paths of MTs (Fig. 6) and multiple CESAs ([Griffiths et al., 2015](#))  
429 during mucilage biosynthesis. IQD9 co-localized with MTs and was sensitive to their  
430 depolymerization by oryzalin, suggesting that IQD9 may be capable of directly binding MTs  
431 like other family members. The DUF4005 domain of IQD16 was recently shown to mediate  
432 MT binding *in vivo* as well as *in vitro* ([Li et al., 2021](#)). As one of the shortest family members  
433 ([Abel et al., 2005](#)), IQD9 lacks the DUF4005 domain but contains a region similar to the  
434 MT2 domain of IQD13 (Fig. S1c), which is sufficient for MT localization *in vivo* ([Sugiyama et al., 2017](#)).  
435 The highly immobile IQD9 proteins could function similarly to KLCR1/CMU1,  
436 its binding partner (Fig. 4), to stabilize the cortical MT arrays of SCE cells and sustain CSC  
437 speed during cellulose deposition. Consistent with this hypothesis, oryzalin treatment of SCE  
438 cells severely disrupted the trajectory and velocity of GFP-CESA3 ([Griffiths et al., 2015](#)).  
439 The reduced velocity of CESA3-containing CSCs in *iqd9* and *trm4* SCE cells (Fig. 7) shows  
440 that multiple classes of proteins are required to shape the circular MT arrays and cellulose  
441 distribution.

442

### 443 **MT organization primarily affects cellulose distribution in seed mucilage**

444 In Arabidopsis, SCE cells display MT and CSC dynamics that are considerably different  
445 from those of hypocotyl and protoxylem vessels ([Griffiths et al., 2015](#); [Watanabe et al., 2015](#);  
446 [Griffiths & North, 2017](#)), which serve as primary and secondary cell wall models. Both  
447 hypocotyl or protoxylem cells show transverse MTs arrays or bundles, aligned with

448 bidirectional movement of CSCs in the PM. The velocities of CSCs during cellulose  
449 deposition range from 200–300 nm min<sup>-1</sup> in the hypocotyl to 300–400 nm min<sup>-1</sup> in the  
450 protoxylem. By contrast, SCE cells display circular MT arrays around the columella, aligned  
451 with unidirectional movement of CSCs with a velocity of 80 to 120 nm min<sup>-1</sup> (Fig. 7,  
452 [Griffiths \*et al.\*, 2015](#)). These unique MT pattern and CSC movements could lead to the  
453 polarized deposition of unusual cellulosic coils, which unwind with the expansion of pectin  
454 polymers during *Arabidopsis* seed hydration ([Šola \*et al.\*, 2019](#)). Cytoskeletal defects in *iqd9*,  
455 *klcr1*, or *trm4* mutants could slow CSC movement to result in shorter cellulose microfibrils  
456 that cannot extend to form long ray-like structures during mucilage release. The compact  
457 mucilage phenotypes of MT-related mutants and galactoglucomannan-deficient seeds such as  
458 *muci10* could be explained by similar deficiencies in the assembly of cellulose chains ([Yu \*et al.\*, 2014](#);  
459 [Voiniciuc \*et al.\*, 2015b](#); [Griffiths & North, 2017](#); [Yang \*et al.\*, 2019](#)),

460 Since relatively abundant MTs line the PM of the mucilage pocket where mucilage  
461 secretion occurs ([McFarlane \*et al.\*, 2008](#)), MTs could also potentially target the secretion of  
462 pectin and hemicelluloses to the apoplast. However, a temperature-sensitive mutation of  
463 *MORI* partially disrupted mucilage release without clearly affecting the secretion of vesicles  
464 to the mucilage pocket and mucilage polymer accumulation ([McFarlane \*et al.\*, 2008](#)). Despite  
465 severely disrupted RFP-TUB6 localization in SCE cells (Fig. 6; [Yang \*et al.\*, 2019](#)), the *iqd9*  
466 and *trm4* seeds released matrix polysaccharides with a composition that was similar to WT  
467 (Fig. 2). Even though the *iqd10-1* mutation partially reduced certain monosaccharides (Fig.  
468 2), the mucilage released from these seeds showed a WT-like appearance (Figs. 1 and 3).  
469 Therefore, cortical MTs appear to have a relatively minor impact on the incorporation of  
470 pectin and hemicelluloses into the mucilage pockets of SCE cells. Unaltered mucilage  
471 adherence to the surface of *iqd9*, *klcr1* and *trm4* seeds is likely mediated by the presence of  
472 xylan ([Voiniciuc \*et al.\*, 2015a](#); [Ralet \*et al.\*, 2016](#)), the SOS5 arabinogalactan protein and the  
473 receptor-like kinase FEI2 ([Harpaz-Saad \*et al.\*, 2011](#); [Griffiths \*et al.\*, 2016](#); [Šola \*et al.\*, 2019](#)).

474

### 475 **IQD, KLCR, and TRM proteins have interconnected functions**

476 Our results and recently published findings indicate that distinct IQD proteins function  
477 in a tissue-specific manner by interacting with KLCR proteins and have potentially  
478 overlapping roles with TRM scaffolding proteins. Based on double mutant analyses (Figs. S2  
479 and S3), the roles of *IQD9* in SCE cells are nearly identical to those of *KLCR1* and *TRM4*.  
480 Therefore, the encoded proteins could be associated as part of a single complex or pathway at  
481 the cell cortex. Some *Arabidopsis* IQDs (GFP-IQD1 or GFP-IQD2) can recruit KLCR1 to

482 MTs when transiently co-expressed in tobacco cells (Bürstenbinder *et al.*, 2013; Zang *et al.*,  
483 2021). The MT recruitment is consistent with our results for the transient expression of  
484 IQD9-GFP and KLCR1 (which behaves similarly when tagged with either RFP or mCherry),  
485 even though KLCR1/CMU1 alone can at least partially bind MTs (Liu *et al.*, 2016; Zang *et*  
486 *al.*, 2021). Furthermore, the KLCR1-IQD2 pair was recently shown to interact with the actin  
487 binding protein NET3C to modulate the shape of the endoplasmic reticulum at PM contact  
488 sites (Zang *et al.*, 2021). We hypothesize that IQD9, KLCR1, TRM4 could be an integral part  
489 of an expanding group of proteins (Polko & Kieber, 2019) that support PM-bound CSC  
490 movement along the orientation of MT tracks. IQDs are hypothesized to function as scaffolds  
491 and may be modified by TON1/TRM/PP2A (TTP)-mediated dephosphorylation (Kumari *et*  
492 *al.*, 2021). Via IQ67-domain-mediated calmodulin binding (Abel *et al.*, 2005), IQDs could  
493 also participate in Ca<sup>2+</sup> signaling to ultimately influence plant cell wall dynamics.

494

#### 495 **Intriguing roles of IQDs during secondary cell wall formation**

496 Even though *IQD9* and *IQD10* promoters were active in both vegetative and  
497 reproductive organs (Fig. S1), *IQD9* was indispensable only for the organization of seed  
498 mucilage polysaccharides (Figs. 1–3). While the expression of IQD9-GFP under its native  
499 promoter was detected only in the general seed coat (Fig. 5 and Fig. S4), KLCR1-GFP was  
500 expressed more ubiquitously in complemented lines. The transcription of *IQD9*, *IQD10* and  
501 *IQD13* was previously associated with secondary cell wall biosynthesis (Mutwil *et al.*, 2008).  
502 Even though we detected transcriptional activity in the vasculature (Fig. S1), the absence of  
503 *IQD9* and/or *IQD10* did not cause *irx* phenotypes found in stems with defective cellulose-  
504 hemicellulose networks (Fig. S6; [Brown \*et al.\*, 2007](#)). Their vascular functions could be  
505 masked by the expression of related genes such as *IQD13*, which was already shown to  
506 modulate MT organization during xylem cell formation (Sugiyama *et al.*, 2017). In poplar,  
507 the down-regulation of *PdIQD10* during wood formation increased the tree height, diameter  
508 and relative cellulose content (Badmi *et al.*, 2018). Since PdIQD10 interacted with PdKLCRs  
509 and could be directed to the nucleus, the elevated cellulosic biomass of the transgenic trees  
510 suggests that IQD-KLCRs participate in a tight feedback-loop that regulates cellulose  
511 biosynthesis (Badmi *et al.*, 2018). In Arabidopsis, multiple *IQDs* likely have redundant roles  
512 during stem development so higher-order mutants would be needed to decipher how IQD-  
513 KLCR are involved in signaling pathways or in direct interactions with secondary wall CSCs.

514

#### 515 **Future avenues to tailor cellulose deposition**

516 The localization of soluble IQD9 and KLCR1/CMU1 (Fig. 5, Liu *et al.*, 2016) proteins  
517 near or at the PM suggests that they could interact with membrane-bound CSC components,  
518 which travel in a spiral pattern during mucilage synthesis (Griffiths *et al.*, 2015). TRM4 was  
519 previously shown to maintain MT organization and directly bind CESA3 (Yang *et al.*, 2019)  
520 to enhance its mobility (Fig. 7). Although the mechanism that connects IQD9 and KLCR1 to  
521 TRM4 requires further investigation, we provide the first evidence that members of these  
522 three MT-associated families cooperate to direct cellulose deposition. Additional CSC-related  
523 genes are expressed during mucilage production (Griffiths & North, 2017), but their putative  
524 roles in mucilage biosynthesis remain to be investigated. Exploring the interactome of IQD9,  
525 KLCR1, and TRM4 could reveal novel targets to fine-tune the biosynthesis of cellulose, the  
526 most abundant renewable material on our planet. In addition to plant studies, the growing  
527 arsenal of proteins found to influence cellulose biosynthesis could be rapidly expressed and  
528 engineered in surrogate hosts (Pauly *et al.*, 2019). Yeast species such as *Pichia pastoris* have  
529 already been used to express a *Populus* CESA capable of producing cellulose microfibrils *in*  
530 *vitro* (Purushotham *et al.*, 2016) and to identify essential protein co-factors for CESA-like  
531 enzymes that catalyze hemicellulose elongation (Voiniciuc *et al.*, 2019). Therefore, synthetic  
532 biology advances combined with attractive plant models, such as the Arabidopsis SCE cells,  
533 provide exciting avenues to refine the fibers that shape plants and many industrial products.

534

### 535 **Acknowledgements**

536 We thank Tilman Jacob, Romina Plötner and Kristina Rosenzweig for technical assistance and  
537 colleagues at the Leibniz Institute of Plant Biochemistry for microscope access. The  
538 *pUBQ:RFP-TUB6*, *pKLCR1:KLCR1-GFP* in *klcr1-1* seeds and the *proCESA3:GFP-CESA3* in  
539 *je5* seeds were provided by Geoffrey Wasteneys (University of British Columbia, CA),  
540 Pengwei Wang (Huazhong Agricultural University, CN) and Samantha Vernhettes (Université  
541 Paris-Saclay, FR), respectively. This work was supported by core funding (Leibniz  
542 Association) from the Federal Republic of Germany and the state of Saxony-Anhalt, and by  
543 DFG grants (BU2955/2-1 and BU2955/1-1 to K.B.; 414353267 to C.V.).

544

### 545 **Authors Contributions**

546 C.V. and K.B. conceived the project. B.Y. performed most of the experiments under C.V.'s  
547 supervision. G.S. and K.B. contributed genetic materials and performed RT-PCR, GUS and  
548 co-IP assays. B.Y. and C.V. analyzed data and wrote the manuscript with input from all authors.

549

---

## 550 References

- 551 **Abel S, Savchenko T, Levy M. 2005.** Genome-wide comparative analysis of the IQD gene  
552 families in *Arabidopsis thaliana* and *Oryza sativa*. *BMC Evolutionary Biology* **5**: 72.
- 553 **Ambrose C, Allard JF, Cytrynbaum EN, Wasteneys GO. 2011.** A CLASP-modulated cell  
554 edge barrier mechanism drives cell-wide cortical microtubule organization in *Arabidopsis*.  
555 *Nature Communications* **2**: 430.
- 556 **Anderson CT, Carroll A, Akhmetova L, Somerville C. 2010.** Real-Time Imaging of  
557 Cellulose Reorientation during Cell Wall Expansion in *Arabidopsis* Roots. *Plant Physiology*  
558 **152**: 787–796.
- 559 **Badmi R, Payyavula RS, Bali G, Guo H-B, Jawdy SS, Gunter LE, Yang X, Winkeler KA,**  
560 **Collins C, Rottmann WH, et al. 2018.** A New Calmodulin-Binding Protein Expresses in the  
561 Context of Secondary Cell Wall Biosynthesis and Impacts Biomass Properties in *Populus*.  
562 *Frontiers in Plant Science* **9**.
- 563 **Ben-Tov D, Abraham Y, Stav S, Thompson K, Loraine A, Elbaum R, de Souza A, Pauly**  
564 **M, Kieber JJ, Harpaz-Saad S. 2015.** COBRA-LIKE2, a Member of the  
565 Glycosylphosphatidylinositol-Anchored COBRA-LIKE Family, Plays a Role in Cellulose  
566 Deposition in *Arabidopsis* Seed Coat Mucilage Secretory Cells. *Plant Physiology* **167**: 711–  
567 724.
- 568 **Ben-Tov D, Idan-Molakandov A, Hugger A, Ben-Shlush I, Günl M, Yang B, Usadel B,**  
569 **Harpaz-Saad S. 2018.** The role of COBRA-LIKE 2 function, as part of the complex network  
570 of interacting pathways regulating *Arabidopsis* seed mucilage polysaccharide matrix  
571 organization. *The Plant Journal* **94**: 497–512.
- 572 **Bringmann M, Landrein B, Schudoma C, Hamant O, Hauser M-T, Persson S. 2012a.**  
573 Cracking the elusive alignment hypothesis: the microtubule–cellulose synthase nexus  
574 unraveled. *Trends in Plant Science* **17**: 666–674.
- 575 **Bringmann M, Li E, Sampathkumar A, Kocabek T, Hauser M-T, Persson S. 2012b.** POM-  
576 POM2/CELLULOSE SYNTHASE INTERACTING1 Is Essential for the Functional  
577 Association of Cellulose Synthase and Microtubules in *Arabidopsis*. *The Plant Cell* **24**: 163–  
578 177.
- 579 **Brown DM, Goubet F, Wong VW, Goodacre R, Stephens E, Dupree P, Turner SR. 2007.**  
580 Comparison of five xylan synthesis mutants reveals new insight into the mechanisms of xylan  
581 synthesis. *The Plant Journal* **52**: 1154–1168.
- 582 **Bürstenbinder K, Möller B, Plötner R, Stamm G, Hause G, Mitra D, Abel S. 2017.** The  
583 IQD Family of Calmodulin-Binding Proteins Links Calcium Signaling to Microtubules,  
584 Membrane Subdomains, and the Nucleus. *Plant Physiology* **173**: 1692–1708.
- 585 **Bürstenbinder K, Savchenko T, Müller J, Adamson AW, Stamm G, Kwong R, Zipp BJ,**  
586 **Dinesh DC, Abel S. 2013.** *Arabidopsis* Calmodulin-binding Protein IQ67-Domain 1 Localizes  
587 to Microtubules and Interacts with Kinesin Light Chain-related Protein-1. *Journal of Biological*  
588 *Chemistry* **288**: 1871–1882.
- 589 **Cowley JM, Burton RA. 2021.** The goo-d stuff: *Plantago* as a myxospermous model with

- 
- 590 modern utility. *New Phytologist* **229**: 1917–1923.
- 591 **Crowell EF, Timpano H, Desprez T, Franssen-Verheijen T, Emons A-M, Höfte H,**  
592 **Vernhettes S. 2011.** Differential Regulation of Cellulose Orientation at the Inner and Outer  
593 Face of Epidermal Cells in the *Arabidopsis* Hypocotyl. *The Plant Cell* **23**: 2592–2605.
- 594 **Desprez T, Juraniec M, Crowell EF, Jouy H, Pochylova Z, Parcy F, Hofte H, Gonneau M,**  
595 **Vernhettes S. 2007.** Organization of cellulose synthase complexes involved in primary cell  
596 wall synthesis in *Arabidopsis thaliana*. *Proceedings of the National Academy of Sciences* **104**:  
597 15572–15577.
- 598 **Duncombe SG, Barnes WJ, Anderson CT. 2020.** Chapter 11 - Imaging the delivery and  
599 behavior of cellulose synthases in *Arabidopsis thaliana* using confocal microscopy. In:  
600 Anderson CT, Haswell ES, Dixit R, eds. *Plant Cell Biology. Methods in Cell Biology.*  
601 Academic Press, 201–213.
- 602 **Endler A, Kesten C, Schneider R, Zhang Y, Ivakov A, Froehlich A, Funke N, Persson S.**  
603 **2015.** A Mechanism for Sustained Cellulose Synthesis during Salt Stress. *Cell* **162**: 1353–1364.
- 604 **Foster CE, Martin TM, Pauly M. 2010.** Comprehensive Compositional Analysis of Plant  
605 Cell Walls (Lignocellulosic biomass) Part II: Carbohydrates. *Journal of Visualized*  
606 *Experiments*: 1837.
- 607 **Ganguly A, Zhu C, Chen W, Dixit R. 2020.** FRA1 Kinesin Modulates the Lateral Stability  
608 of Cortical Microtubules through Cellulose Synthase–Microtubule Uncoupling Proteins. *The*  
609 *Plant Cell* **32**: 2508–2524.
- 610 **Gantner J, Ordon J, Ilse T, Kretschmer C, Gruetzner R, Löffke C, Dagdas Y,**  
611 **Bürstenbinder K, Marillonnet S, Stuttmann J. 2018.** Peripheral infrastructure vectors and  
612 an extended set of plant parts for the Modular Cloning system. *PLOS ONE* **13**: e0197185.
- 613 **Grefen C, Chen Z, Honsbein A, Donald N, Hills A, Blatt MR. 2010.** A Novel Motif Essential  
614 for SNARE Interaction with the K<sup>+</sup> Channel KC1 and Channel Gating in *Arabidopsis*. *The*  
615 *Plant Cell* **22**: 3076–3092.
- 616 **Griffiths JS, Crepeau M-J, Ralet M-C, Seifert GJ, North HM. 2016.** Dissecting Seed  
617 Mucilage Adherence Mediated by FEI2 and SOS5. *Frontiers in Plant Science* **7**: 1–13.
- 618 **Griffiths JS, North HM. 2017.** Sticking to cellulose: exploiting *Arabidopsis* seed coat  
619 mucilage to understand cellulose biosynthesis and cell wall polysaccharide interactions. *New*  
620 *Phytologist* **214**: 959–966.
- 621 **Griffiths JS, Šola K, Kushwaha R, Lam P, Tateno M, Young R, Voiniciuc C, Dean G,**  
622 **Mansfield SD, DeBolt S, et al. 2015.** Unidirectional Movement of Cellulose Synthase  
623 Complexes in *Arabidopsis* Seed Coat Epidermal Cells Deposit Cellulose Involved in Mucilage  
624 Extrusion, Adherence, and Ray Formation. *Plant Physiology* **168**: 502–520.
- 625 **Griffiths JS, Tsai AYL, Xue H, Voiniciuc C, Šola K, Seifert GJ, Mansfield SD, Haughn**  
626 **GW. 2014.** SALT-OVERLY SENSITIVE5 mediates *arabidopsis* seed coat mucilage  
627 adherence and organization through pectins. *Plant Physiology* **165**: 991–1004.
- 628 **Gutierrez R, Lindeboom JJ, Paredez AR, Emons AMC, Ehrhardt DW. 2009.** *Arabidopsis*

- 629 cortical microtubules position cellulose synthase delivery to the plasma membrane and interact  
630 with cellulose synthase trafficking compartments. *Nature Cell Biology* **11**: 797–806.
- 631 **Hamada T. 2014.** Microtubule Organization and Microtubule-Associated Proteins in Plant  
632 Cells. In: International Review of Cell and Molecular Biology. Elsevier, 1–52.
- 633 **Harpaz-Saad S, McFarlane HE, Xu S, Divi UK, Forward B, Western TL, Kieber JJ. 2011.**  
634 Cellulose synthesis via the FEI2 RLK/SOS5 pathway and CELLULOSE SYNTHASE 5 is  
635 required for the structure of seed coat mucilage in Arabidopsis: Synthesis of cellulose in seed  
636 mucilage. *The Plant Journal* **68**: 941–953.
- 637 **Hu R, Li J, Wang X, Zhao X, Yang X, Tang Q, He G, Zhou G, Kong Y. 2016.** Xylan  
638 synthesized by Irregular Xylem 14 ( IRX14 ) maintains the structure of seed coat mucilage in  
639 Arabidopsis. *Journal of Experimental Botany* **67**: 1243–1257.
- 640 **Karimi M, Inzé D, Depicker A. 2002.** GATEWAY vectors for Agrobacterium-mediated plant  
641 transformation. *Trends in Plant Science* **7**: 193–195.
- 642 **Kölling M, Kumari P, Bürstenbinder K. 2019.** Calcium- and calmodulin-regulated  
643 microtubule-associated proteins as signal-integration hubs at the plasma membrane-  
644 cytoskeleton nexus. *Journal of Experimental Botany* **70**: 387–396.
- 645 **Kumari P, Dahiya P, Livanos P, Zergiebel L, Kölling M, Poeschl Y, Stamm G, Hermann  
646 A, Abel S, Müller S, et al. 2021.** IQ67 DOMAIN proteins facilitate preprophase band  
647 formation and division-plane orientation. *Nature Plants*: 1–9.
- 648 **Li Y, Huang Y, Wen Y, Wang D, Liu H, Li Y, Zhao J, An L, Yu F, Liu X. 2021.** The  
649 domain of unknown function 4005 (DUF4005) in an Arabidopsis IQD protein functions in  
650 microtubule binding. *Journal of Biological Chemistry* **297**: 100849.
- 651 **Li S, Lei L, Somerville CR, Gu Y. 2012.** Cellulose synthase interactive protein 1 (CSI1) links  
652 microtubules and cellulose synthase complexes. *Proceedings of the National Academy of  
653 Sciences* **109**: 185–190.
- 654 **Liang H, Zhang Y, Martinez P, Rasmussen CG, Xu T, Yang Z. 2018.** The Microtubule-  
655 Associated Protein IQ67 DOMAIN5 Modulates Microtubule Dynamics and Pavement Cell  
656 Shape. *Plant Physiology* **177**: 1555–1568.
- 657 **Liu Z, Schneider R, Kesten C, Zhang Y, Somssich M, Zhang Y, Fernie AR, Persson S.  
658 2016.** Cellulose-Microtubule Uncoupling Proteins Prevent Lateral Displacement of  
659 Microtubules during Cellulose Synthesis in Arabidopsis. *Developmental Cell* **38**: 305–315.
- 660 **Lloyd C, Hussey P. 2001.** Microtubule-associated proteins in plants — why we need a map.  
661 *Nature Reviews Molecular Cell Biology* **2**: 40–47.
- 662 **McFarlane HE, Young RE, Wasteneys GO, Samuels AL. 2008.** Cortical microtubules mark  
663 the mucilage secretion domain of the plasma membrane in Arabidopsis seed coat cells. *Planta*  
664 **227**: 1363–1375.
- 665 **Mendu V, Griffiths JS, Persson S, Stork J, Downie AB, Voiniciuc C, Haughn GW, DeBolt  
666 S. 2011.** Subfunctionalization of Cellulose Synthases in Seed Coat Epidermal Cells Mediates  
667 Secondary Radial Wall Synthesis and Mucilage Attachment. *Plant Physiology* **157**: 441–453.



- 668 **Mielke S, Zimmer M, Meena MK, Dreos R, Stellmach H, Hause B, Voiniciuc C, Gasperini**  
669 **D. 2021.** Jasmonate biosynthesis arising from altered cell walls is prompted by turgor-driven  
670 mechanical compression. *Science Advances* **7**: eabf0356.
- 671 **Mitra D, Klemm S, Kumari P, Quegwer J, Möller B, Poeschl Y, Pflug P, Stamm G, Abel**  
672 **S, Bürstenbinder K. 2019.** Microtubule-associated protein IQ67 DOMAIN5 regulates  
673 morphogenesis of leaf pavement cells in *Arabidopsis thaliana*. *Journal of Experimental Botany*  
674 **70**: 529–543.
- 675 **Mutwil M, Obro J, Willats WGT, Persson S. 2008.** GeneCAT--novel webtools that combine  
676 BLAST and co-expression analyses. *Nucleic Acids Research* **36**: W320–W326.
- 677 **Nakagawa T, Suzuki T, Murata S, Nakamura S, Hino T, Maeo K, Tabata R, Kawai T,**  
678 **Tanaka K, Niwa Y, et al. 2007.** Improved Gateway binary vectors: high-performance vectors  
679 for creation of fusion constructs in transgenic analysis of plants. *Bioscience, Biotechnology,*  
680 *and Biochemistry* **71**: 2095–2100.
- 681 **North HM, Berger A, Saez-Aguayo S, Ralet M-C. 2014.** Understanding polysaccharide  
682 production and properties using seed coat mutants: future perspectives for the exploitation of  
683 natural variants. *Annals of Botany* **114**: 1251–1263.
- 684 **Paredez AR, Somerville CR, Ehrhardt DW. 2006.** Visualization of Cellulose Synthase  
685 Demonstrates Functional Association with Microtubules. *Science* **312**: 1491–1495.
- 686 **Pauly M, Gawenda N, Wagner C, Fischbach P, Ramírez V, Axmann IM, Voiniciuc C.**  
687 **2019.** The Suitability of Orthogonal Hosts to Study Plant Cell Wall Biosynthesis. *Plants* **8**: 516.
- 688 **Polko JK, Barnes WJ, Voiniciuc C, Doctor S, Steinwand B, Hill JL, Tien M, Pauly M,**  
689 **Anderson CT, Kieber JJ. 2018.** SHOU4 Proteins Regulate Trafficking of Cellulose Synthase  
690 Complexes to the Plasma Membrane. *Current Biology* **28**: 3174–3182.e6.
- 691 **Polko JK, Kieber JJ. 2019.** The Regulation of Cellulose Biosynthesis in Plants. *The Plant*  
692 *Cell* **31**: 282–296.
- 693 **Purushotham P, Cho SH, Díaz-Moreno SM, Kumar M, Nixon BT, Bulone V, Zimmer J.**  
694 **2016.** A single heterologously expressed plant cellulose synthase isoform is sufficient for  
695 cellulose microfibril formation in vitro. *Proceedings of the National Academy of Sciences* **113**:  
696 11360–11365.
- 697 **Ralet M-C, Crépeau M-J, Vigouroux J, Tran J, Berger A, Sallé C, Granier F, Botran L,**  
698 **North HM. 2016.** Xylans Provide the Structural Driving Force for Mucilage Adhesion to the  
699 *Arabidopsis* Seed Coat. *Plant Physiology* **171**: 165–178.
- 700 **Sedbrook JC, Kaloriti D. 2008.** Microtubules, MAPs and plant directional cell expansion.  
701 *Trends in Plant Science* **13**: 303–310.
- 702 **Šola K, Dean GH, Haughn GW. 2019.** *Arabidopsis* Seed Mucilage: A Specialised  
703 Extracellular Matrix that Demonstrates the Structure–Function Versatility of Cell Wall  
704 Polysaccharides. *Annual Plant Reviews online* **2**: 1085–1116.
- 705 **Sugiyama Y, Wakazaki M, Toyooka K, Fukuda H, Oda Y. 2017.** A Novel Plasma  
706 Membrane-Anchored Protein Regulates Xylem Cell-Wall Deposition through Microtubule-

- 
- 707 Dependent Lateral Inhibition of Rho GTPase Domains. *Current Biology* **27**: 2522-2528.e4.
- 708 **Sullivan S, Ralet M-C, Berger A, Diatloff E, Bischoff V, Gonneau M, Marion-Poll A,**  
709 **North HM. 2011.** CESA5 Is Required for the Synthesis of Cellulose with a Role in Structuring  
710 the Adherent Mucilage of Arabidopsis Seeds. *Plant Physiology* **156**: 1725–1739.
- 711 **Updegraff DM. 1969.** Semimicro determination of cellulose in biological materials. *Analytical*  
712 *Biochemistry* **32**: 420–424.
- 713 **Vellosillo T, Yeats T, Sorek N. 2015.** Analysis of in vivo Cellulose Biosynthesis in  
714 Arabidopsis Cells by Spinning Disk Confocal Microscopy. *Bio-protocol* **5**: e1617–e1617.
- 715 **Viudes S, Burlat V, Dunand C. 2020.** Seed mucilage evolution: Diverse molecular  
716 mechanisms generate versatile ecological functions for particular environments. *Plant, Cell &*  
717 *Environment* **43**: 2857–2870.
- 718 **Viudes S, Dunand C, Burlat V. 2021.** Myxospermy Evolution in Brassicaceae: A Highly  
719 Complex and Diverse Trait with Arabidopsis as an Uncommon Model. *Cells* **10**: 2470.
- 720 **Voiniciuc C. 2016.** Quantification of the Mucilage Detachment from Arabidopsis Seeds. *BIO-*  
721 *PROTOCOL* **6**: 1–9.
- 722 **Voiniciuc C, Dama M, Gawenda N, Stritt F, Pauly M. 2019.** Mechanistic insights from plant  
723 heteromannan synthesis in yeast. *Proceedings of the National Academy of Sciences* **116**: 522–  
724 527.
- 725 **Voiniciuc C, Guenl M, Schmidt MH-W, Usadel B. 2015a.** Highly Branched Xylan Made by  
726 IRX14 and MUCI21 Links Mucilage to Arabidopsis Seeds. *Plant Physiology*: pp.01441.2015.
- 727 **Voiniciuc C, Günl M. 2016.** Analysis of Monosaccharides in Total Mucilage Extractable from  
728 Arabidopsis Seeds. *Bio-protocol* **6**: e1801–e1801.
- 729 **Voiniciuc C, Schmidt MH-W, Berger A, Yang B, Ebert B, Scheller HV, North HM, Usadel**  
730 **B, Günl M. 2015b.** MUCILAGE-RELATED10 Produces Galactoglucomannan That  
731 Maintains Pectin and Cellulose Architecture in Arabidopsis Seed Mucilage. *Plant Physiology*  
732 **169**: 403–420.
- 733 **Voiniciuc C, Yang B, Schmidt MH-W, Günl M, Usadel B. 2015c.** Starting to Gel: How  
734 Arabidopsis Seed Coat Epidermal Cells Produce Specialized Secondary Cell Walls.  
735 *International Journal of Molecular Sciences* **16**: 3452–3473.
- 736 **Voiniciuc C, Zimmermann E, Schmidt MH-W, Günl M, Fu L, North HM, Usadel B. 2016.**  
737 Extensive Natural Variation in Arabidopsis Seed Mucilage Structure. *Frontiers in Plant*  
738 *Science* **7**: 1–14.
- 739 **Watanabe Y, Meents MJ, McDonnell LM, Barkwill S, Sampathkumar A, Cartwright HN,**  
740 **Demura T, Ehrhardt DW, Samuels AL, Mansfield SD. 2015.** Visualization of cellulose  
741 synthases in Arabidopsis secondary cell walls. *Science* **350**: 198–203.
- 742 **Yang B, Hofmann F, Usadel B, Voiniciuc C. 2021.** Seed hemicelluloses tailor mucilage  
743 properties and salt tolerance. *New Phytologist* **229**: 1946–1954.

744 **Yang B, Voiniciuc C, Fu L, Dieluweit S, Klose H, Usadel B. 2019.** TRM4 is essential for  
745 cellulose deposition in Arabidopsis seed mucilage by maintaining cortical microtubule  
746 organization and interacting with CESA3. *New Phytologist* **221**: 881–895.

747 **Yu L, Shi D, Li J, Kong Y, Yu Y, Chai G, Hu R, Wang J, Hahn MG, Zhou G. 2014.**  
748 CELLULOSE SYNTHASE-LIKE A2, a glucomannan synthase, is involved in maintaining  
749 adherent mucilage structure in arabidopsis seed. *Plant Physiology* **164**: 1842–1856.

750 **Zang J, Klemm S, Pain C, Duckney P, Bao Z, Stamm G, Kriechbaumer V, Bürstenbinder**  
751 **K, Hussey PJ, Wang P. 2021.** A novel plant actin-microtubule bridging complex regulates  
752 cytoskeletal and ER structure at ER-PM contact sites. *Current Biology* **31**: 1251-1260.e4.

753 **Zhang Y, Nikolovski N, Sorieul M, Vellosillo T, McFarlane HE, Dupree R, Kesten C,**  
754 **Schneider R, Driemeier C, Lathe R, et al. 2016.** Golgi-localized STELLO proteins regulate  
755 the assembly and trafficking of cellulose synthase complexes in Arabidopsis. *Nature*  
756 *Communications* **7**: 11656.

757

## 758 **Figure Legends**

759 **Fig. 1** Mutation of *IQD9* and *KLCR1* caused compact mucilage capsule. (a) Expression  
760 profiles in the seed eFP browser (Winter *et al.*, 2007; Le *et al.*, 2010), including absolute  
761 expression values. Glob. (globular); Cotyl. (cotyledon). (b) UTR, intron and exon structure of  
762 candidate genes. The position and the effects of T-DNA insertions were verified using RT-  
763 PCR, *ACTIN2* as a reference gene, g as genomic DNA control, and – as no DNA control.  
764 Transgene complemented were marked by + *IQD* or + *KLCR*. Scale bars for gene models =  
765 1000 bp. (c) RR staining of adherent mucilage capsules after gentle shaking in water. Bars =  
766 100  $\mu$ m. (d) Seed (triangles) and RR-stained mucilage (black dots) area of four biological  
767 replicates (>20 seeds each) per genotype. Boxes show the 25–75% quartiles, the median  
768 value (inner horizontal line), and whiskers extending to the largest/smallest values. Different  
769 letters mark  $P < 0.01$  for one-way ANOVA with Tukey test. (e) Absolute amounts of  
770 monosaccharides in sequentially-extracted mucilage fractions. Data show mean  $\pm$ SD of 5  
771 biological replicates, and asterisks mark significant changes compared to WT (Student's t-  
772 test,  $P < 0.001$ ). See Fig. 2 for detailed composition.

773

774 **Fig. 2** Composition of matrix polysaccharides in seed mucilage extracts. (a) Non-adherent  
775 and (b) adherent mucilage polysaccharides were sequentially extracted using water and  
776 different mixing intensities. Data show mean + SD of 5 biological replicates (only 3 for  
777 *muci10*). Red asterisks and arrows (for galactoglucomannan subunits) mark differences from  
778 WT (Student's t-test,  $P < 0.0001$ ).

779

780 **Fig. 3** *IQD9* and *KLCR1* are important for cellulose deposition around seed surface. (a) S4B-  
781 stained cellulosic rays in mucilage capsules. Bars = 100  $\mu$ m. (b) The length of cellulosic rays  
782 stained with S4B. Boxes show the 25–75% quartiles, the median value (inner horizontal line),  
783 and whiskers extending to the largest/smallest values ( $\geq 10$  measurements per biological  
784 replicate). (c) Crystalline cellulose content in whole seeds (5 biological replicates per  
785 genotype, except 3 for *muci10*). Different letters in (b) and (c) mark significant changes (one-  
786 way ANOVA with Tukey test,  $P < 0.01$ ).

787

788 **Fig. 4** *IQD9* co-aligns and interacts with *KLCR1*. (a) *IQD9*-GFP localized in cortical arrays  
789 in *N. benthamiana* cells. (b) RFP-*KLCR1* shows diffuse localization when overexpressed on  
790 its own in tobacco. (c) Subcellular co-localization of *IQD9*-GFP and mCherry-*KLCR1* in the  
791 mock and oryzalin-treated tobacco epidermal cells. Both transiently expressed proteins were  
792 oryzalin-sensitive. (d) Fluorescent intensity plot along the dashed line in (c). Bars = 10  $\mu$ m.  
793 (e) Pearson correlation coefficient between *IQD9*-GFP and mCherry-*KLCR1* in (c),  $n=5$  cells  
794 from 5 independent treatments. (f) Co-IP of proteins transiently expressed in tobacco leaves.  
795 Colored triangles marked the expected size of each protein. Labels: Input (protein supernatant  
796 before adding the GFP-Trap beads); Super (unbound supernatant after bead incubation);  
797 Wash (Supernatant from last wash step); Beads (co-IP proteins that tightly bind GFP-Trap).

798

799 **Fig. 5** *IQD9* and *KLCR1* localization during mucilage biosynthesis in complemented lines.  
800 (a) Z-stack maximum projection of *IQD9*-GFP SCE cells stained with FM4-64 at 7 DPA.  
801 *IQD9* is localized at the PM, MTs and in a nuclear body (arrow). (b) Time-lapse of *IQD9*-  
802 GFP and kymograph along the dashed line. (c) Cross-sectional views of SCE cells expressing  
803 *IQD9*-GFP. The arrow marks a nuclear compartment. (d) Cross-sectional views of SCE cells  
804 expressing *KLCR1*-GFP during mucilage biosynthesis. Bars = 10  $\mu$ m.

805

806 **Fig. 6** MT organization was impaired in *iqd9* SCE cells. Z-stack maximum projections of  
807 RFP-TUB6 in the SCE cells at 7 DPA stage. RFP-TUB6 cortical arrays formed in the WT  
808 background but not in *iqd9* SCE cells. WT cells without RFP-TUB6 served as a negative  
809 control. Bars = 50  $\mu$ m.

810

811 **Fig. 7** *IQD9* and *TRM4* enhance the velocity of GFP-CESA3 proteins.

812 (a) Single and time-lapse images (acquired every 5 s for 300 s) of GFP-CESA3 in WT, *iqd9*  
813 and *trm4* SCE cells at 7 DPA. The bottom row shows kymographs of GFP-CESA3 from

814 dashed lines in the middle row. Bars = 10  $\mu$ m. (b) Mean GFP-CESA3 velocity in 9 cells from  
815 three plants per genotype. Letters label significant differences (one-way ANOVA with Tukey  
816 test,  $P < 0.01$ ). (c) Distribution of GFP-CESA3 velocities for analyzed particles (N=209 for  
817 WT, 170 for *iqd9* and 131 for *trm4*).
